# Supplementary material for: Regulating microglial miR-155 transcriptional phenotype alleviates Alzheimer’s-induced retinal vasculopathy by limiting Clec7a/Galectin-3+ neurodegenerative microglia
Source: PubMed Central journal article supplement (PMC9461176; doi:10.1186/s40478-022-01439-z), 2022-09-08
Supplement: 40478_2022_1439_MOESM1_ESM.pdf [file 40478_2022_1439_MOESM1_ESM.pdf]

# Microglial miR-155

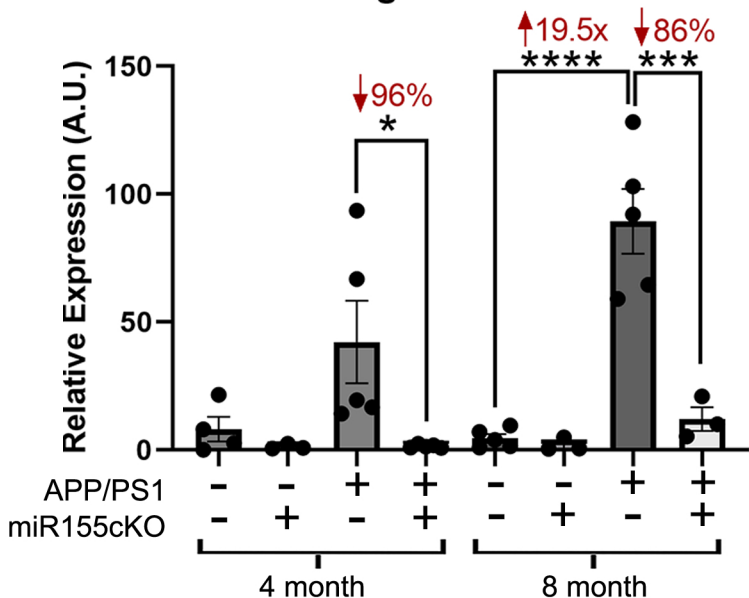

**Supplementary figure 1.** Quantitative reverse transcription polymerase chain reaction (qRT-PCR) analyses for expression of miR-155 in isolated microglia from mouse brains. \* $p < 0.05$ , \*\*\* $p < 0.001$ , \*\*\*\* $p < 0.0001$ , by one-way ANOVA with Tukey's post-hoc multiple comparison test. Fold changes and percentage decreases are shown in red.

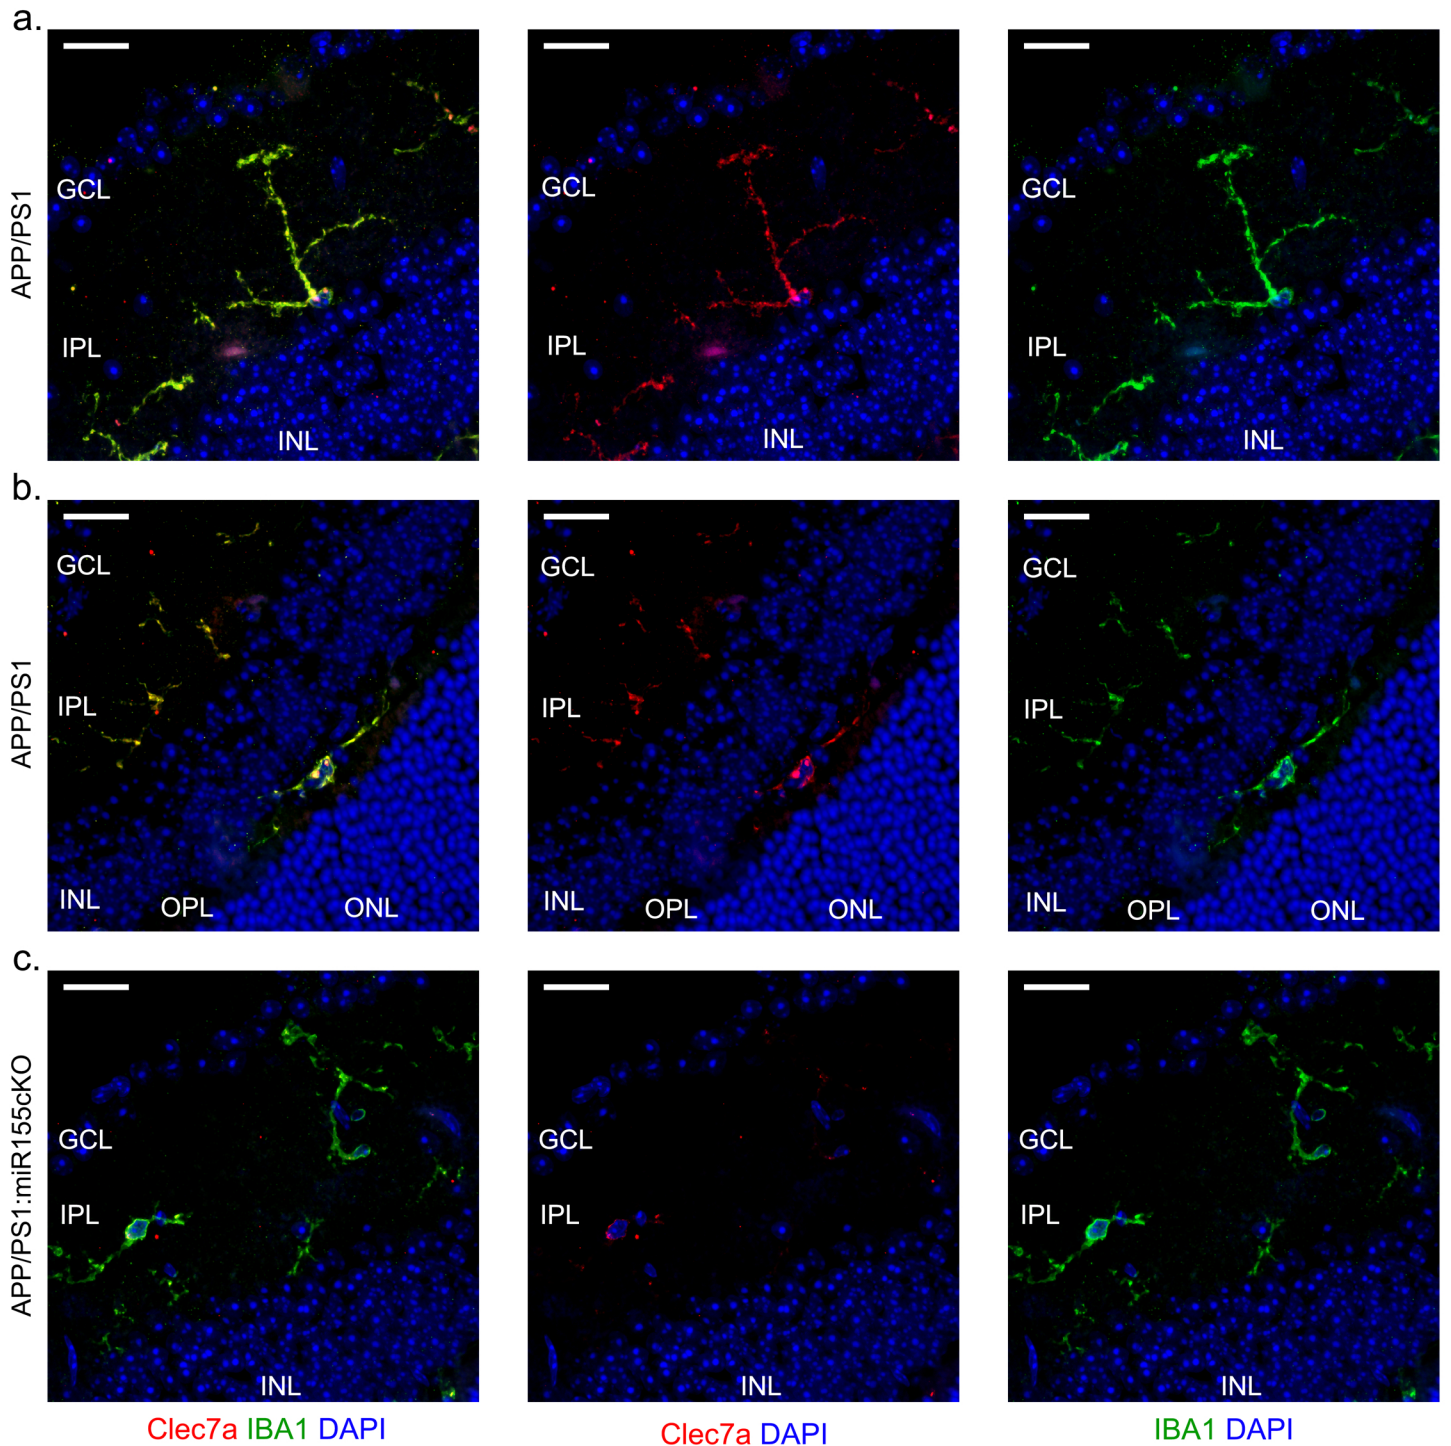

**Supplementary figure 2.** Retinal cross-section staining for Clec7a<sup>+</sup> and Iba1<sup>+</sup> microglia. **a-c.** Representative images of eye cross-section immunofluorescent staining for Clec7a<sup>+</sup> microglia (red), Iba1<sup>+</sup> microglia (green) and DAPI (blue) from **a-b.** APP/PS1 mice or **c.** APP/PS1:miR155cKO mice. Images were taken under 63x microscope objectives. Scale bars=10μm. GCL-ganglion cell layer. IPL-inner plexiform layer. INL-inner nuclear layer. OPL-outer plexiform layer. ONL-outer nuclear layer.

a.

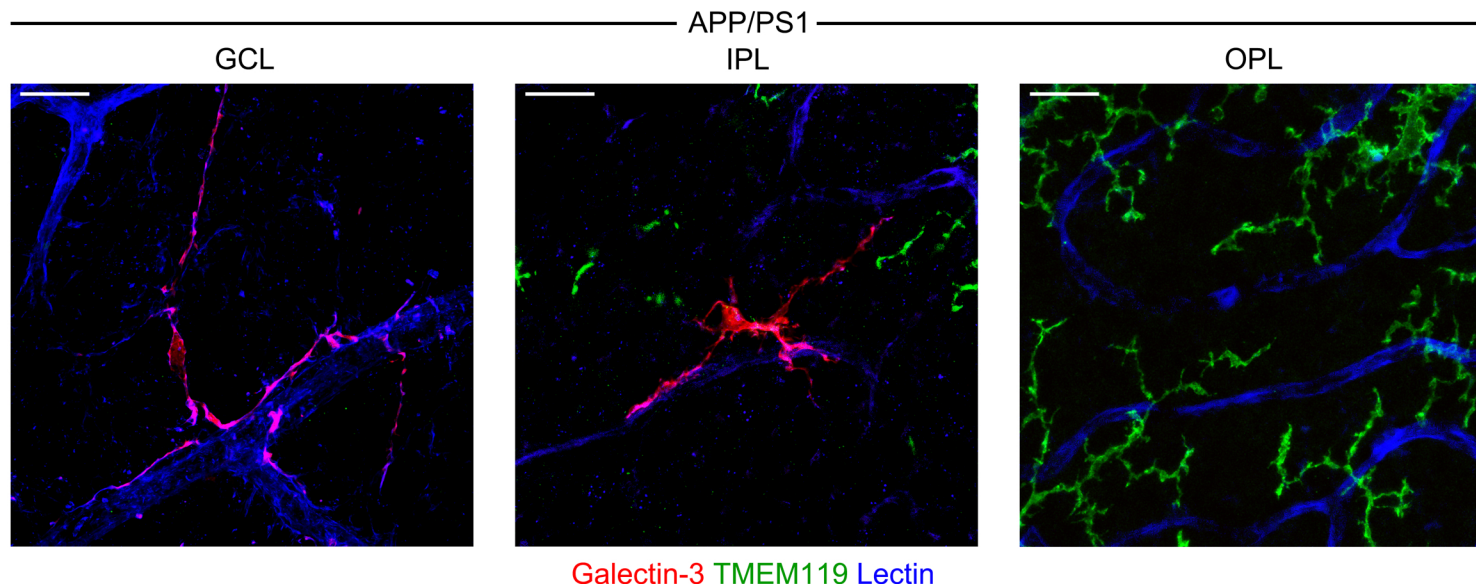

b.

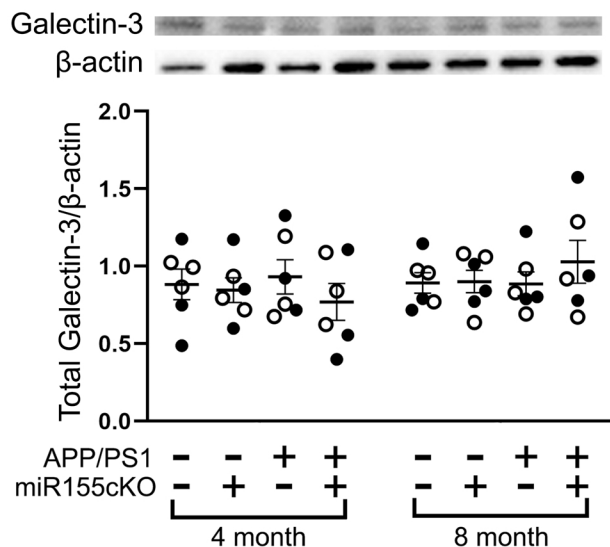

**Supplementary figure 3.** Supplementary data for Galectin-3<sup>+</sup> microglia. **a.** Representative images of immunofluorescent staining for Galectin-3<sup>+</sup> microglia (red), Tmem119<sup>+</sup> microglia (green) and lectin for blood vessels (blue) on retinal flat-mounts from an APP/PS1 mouse. GCL-ganglion cell layer. IPL-inner plexiform layer. OPL-outer plexiform layer. Images were taken under 63x microscope objectives. Scale bars=10 $\mu$ m. **b.** Densitometric analysis of western-blotting protein bands of Galectin-3 normalized by  $\beta$ -actin control for retinal lysates from all experimental groups (total n=48, n=6 each group). Data from individual mouse (circles) as well as group means  $\pm$  SEMs are shown. Black-filled circles represent males and clear circles represent females.



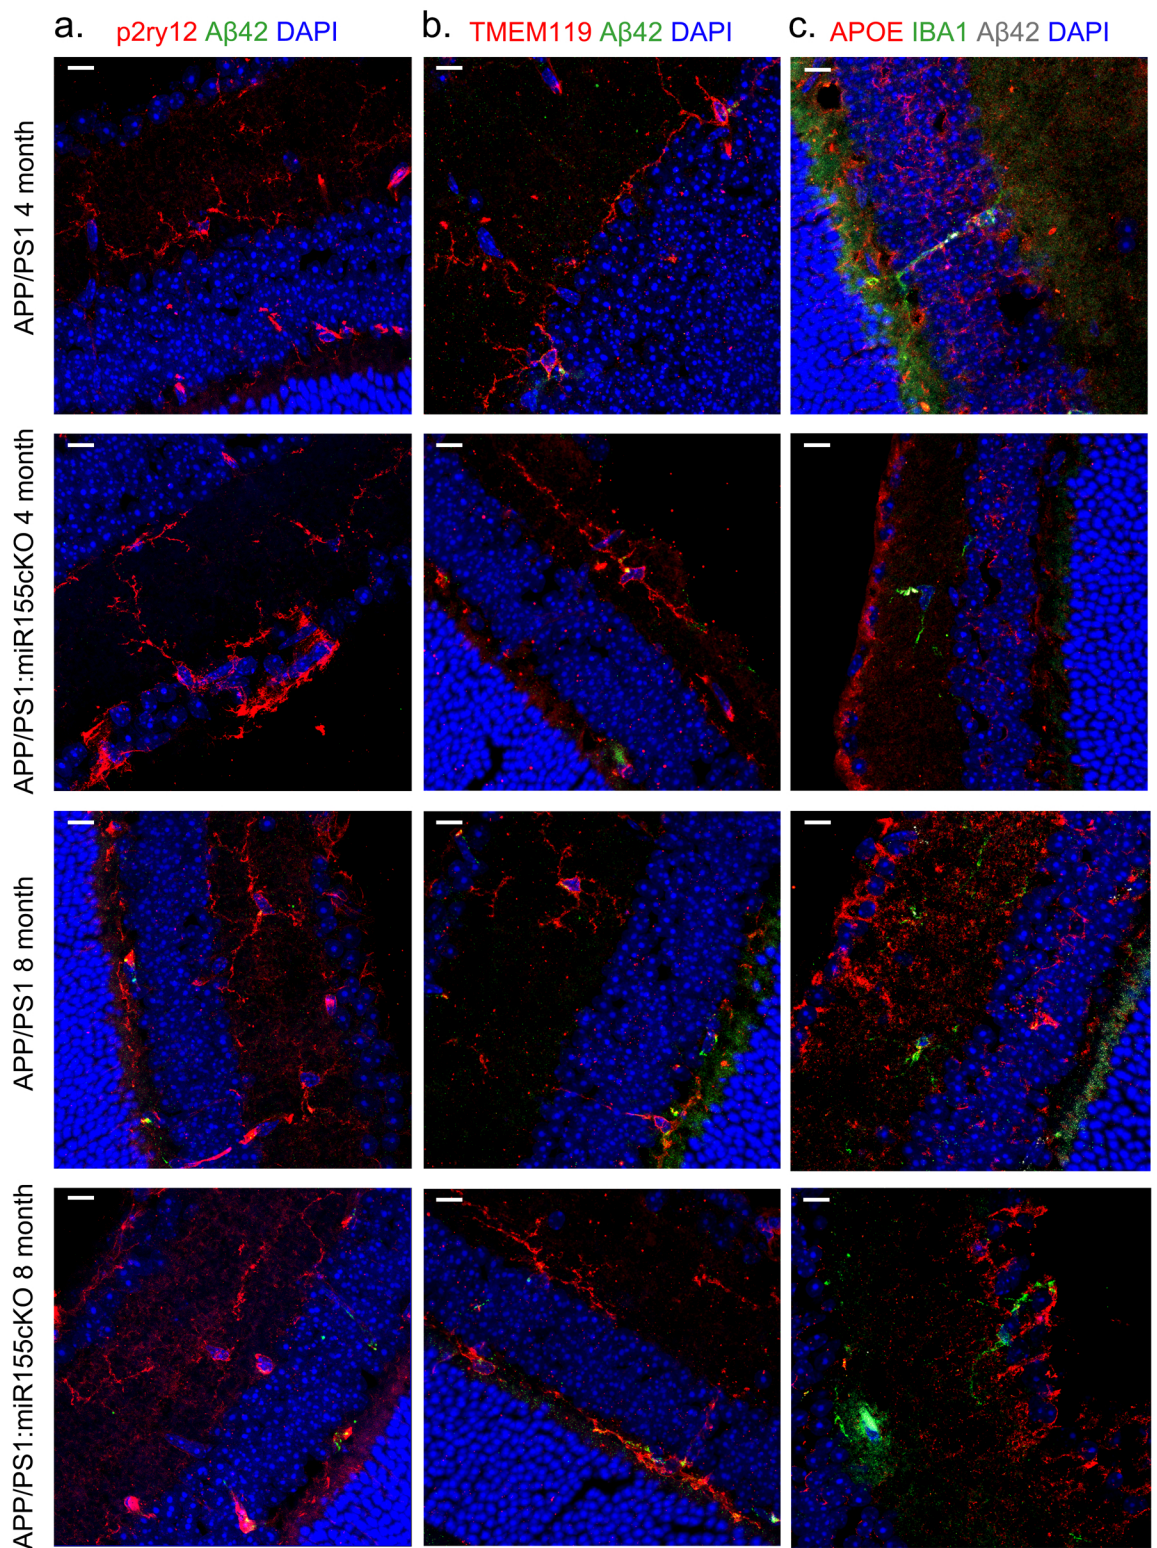

**Supplementary figure 4.** Representative images of P2ry12<sup>+</sup>, Tmem119<sup>+</sup> and Apoe<sup>+</sup> microglia in retinal cross-section. **a-c.** Representative images of immunofluorescent staining for a. P2ry12 (red)/Aβ42 (12F4, green)/DAPI (blue), b. Tmem119 (red)/Aβ42 (12F4, green)/DAPI (blue), and c. Apoe (red)/Iba1 (green)/Aβ42 (12F4, white)/DAPI (blue) on retinal cross-sections. Images were taken under 63x microscope objectives. Scale bars=10μm.



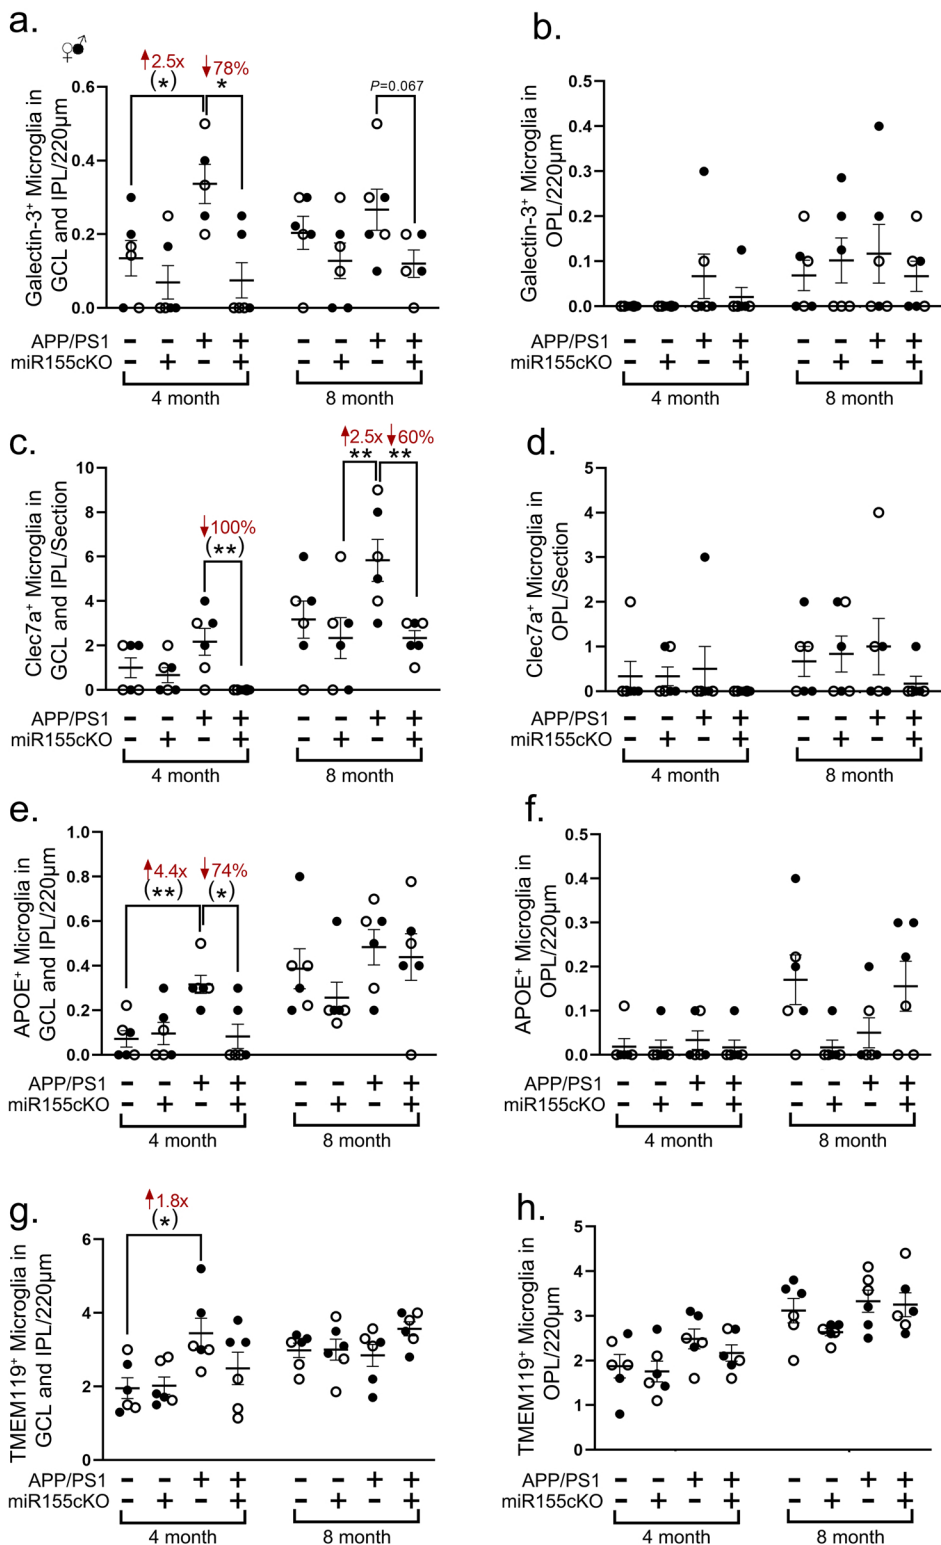

**Supplementary figure 5.** Extended manual counting of different phenotypes of microglia. **a-h.** Manual counting of **a-b.** Galectin-3<sup>+</sup>, **c-d.** Clec7a<sup>+</sup>, **e-f.** Apoe<sup>+</sup>, **g-h.** Tmem119<sup>+</sup> microglia in retinal cross-sections from all experimental groups (total n=48, n=6 each group) in ganglion cell layers (GCL) and inner plexiform layers (IPL) (left row) versus outer plexiform layers (OPL) (right row). \*p < 0.05, \*\*p < 0.01, by three-way ANOVA with Tukey's post-hoc multiple comparison test. Two group statistical analysis was performed using an unpaired 2-tailed Student t-test and was shown in parentheses. Fold changes and percentage decreases are shown in red.

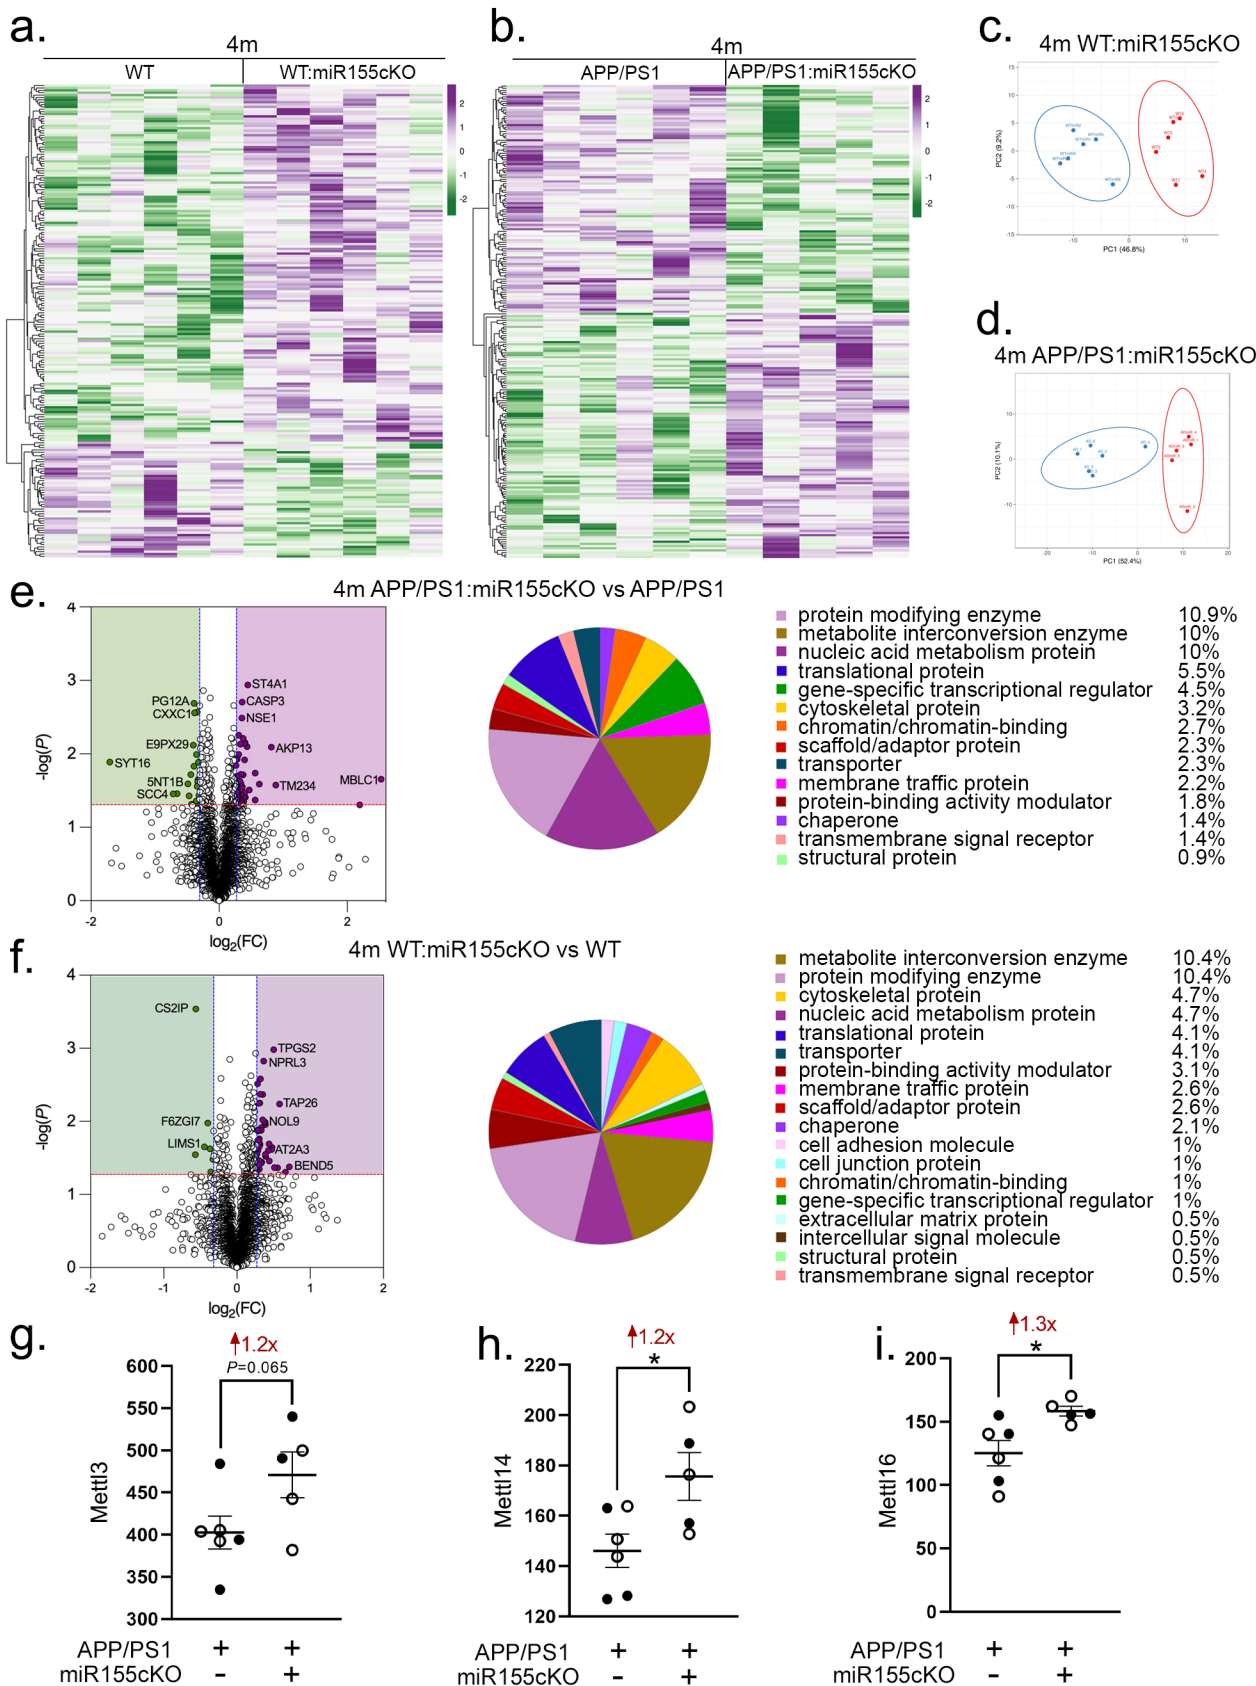

**Supplementary figure 6.** Retinal proteomic analysis for 4-month-old experimental groups. **a-b.** Detectable protein hierarchies displayed as heatmaps from **a.** 4-month-old WT:miR155cKO versus WT or **b.** 4-month-old APP/PS1:miR155cKO versus APP/PS1; upregulated proteins are shown in purple and downregulated proteins in green. **c-d.** Principal component analysis for **a.** and **b.** **e-f.** Volcano plots and Pie chart of PANTHER functional classification analysis for **a.** and **b.** **g-i.** Plotting of proteomics measurement of mettl proteins. \* $p < 0.05$ , by unpaired 2-tailed Student t-test. Fold changes are shown in red.

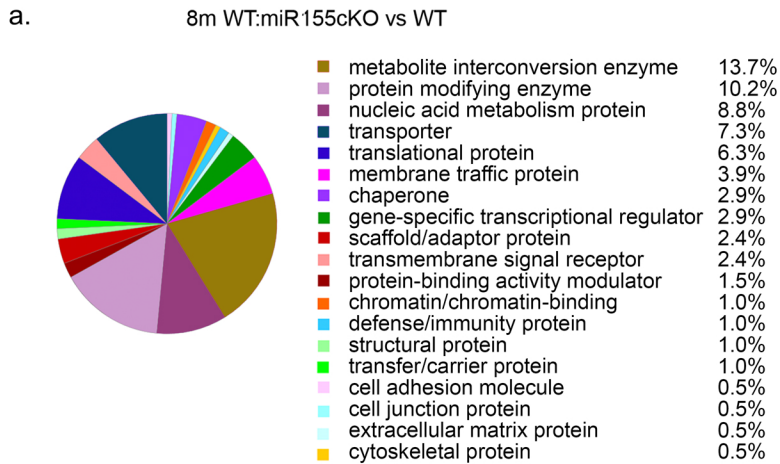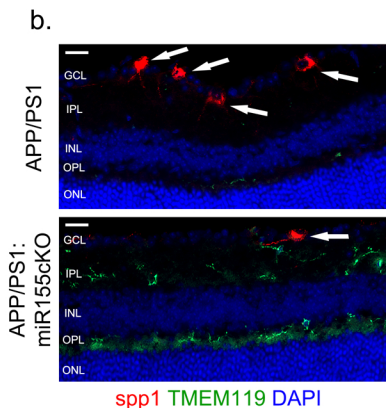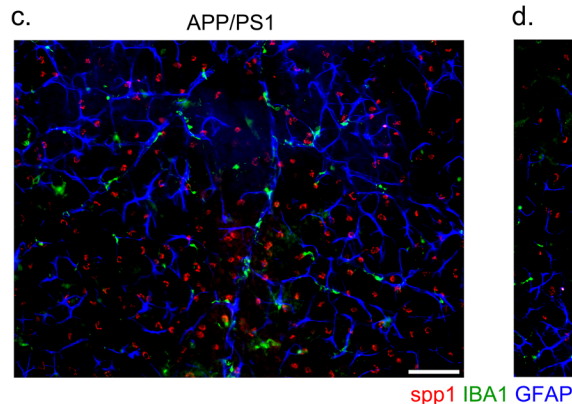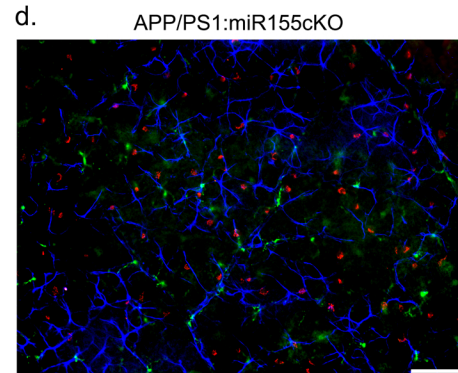

**Supplementary figure 7.** Extended proteomic data for figure 4. **a.** Pie chart of PANTHER functional classification analysis showing fraction and percentage of significant differentially expressed proteins (DEPs, up- or downregulated proteins) grouped by protein class category based on 8-month-old WT:miR155cKO versus WT. **b.** Representative images of immunofluorescent staining for Spp1 (red)/Tmem119 (green)/DAPI (blue) on retinal cross-sections. Images were taken under 20x microscope objectives. Scale bars=10µm. **c-d.** Representative images of immunofluorescent staining for Spp1 (red), Iba1 (green) and Gfap (blue) on retinal flat-mounts from **c.** APP/PS1 mouse or **d.** APP/PS1:miR155cKO mouse. Images were taken under 10x microscope objectives. Scale bars=10µm.



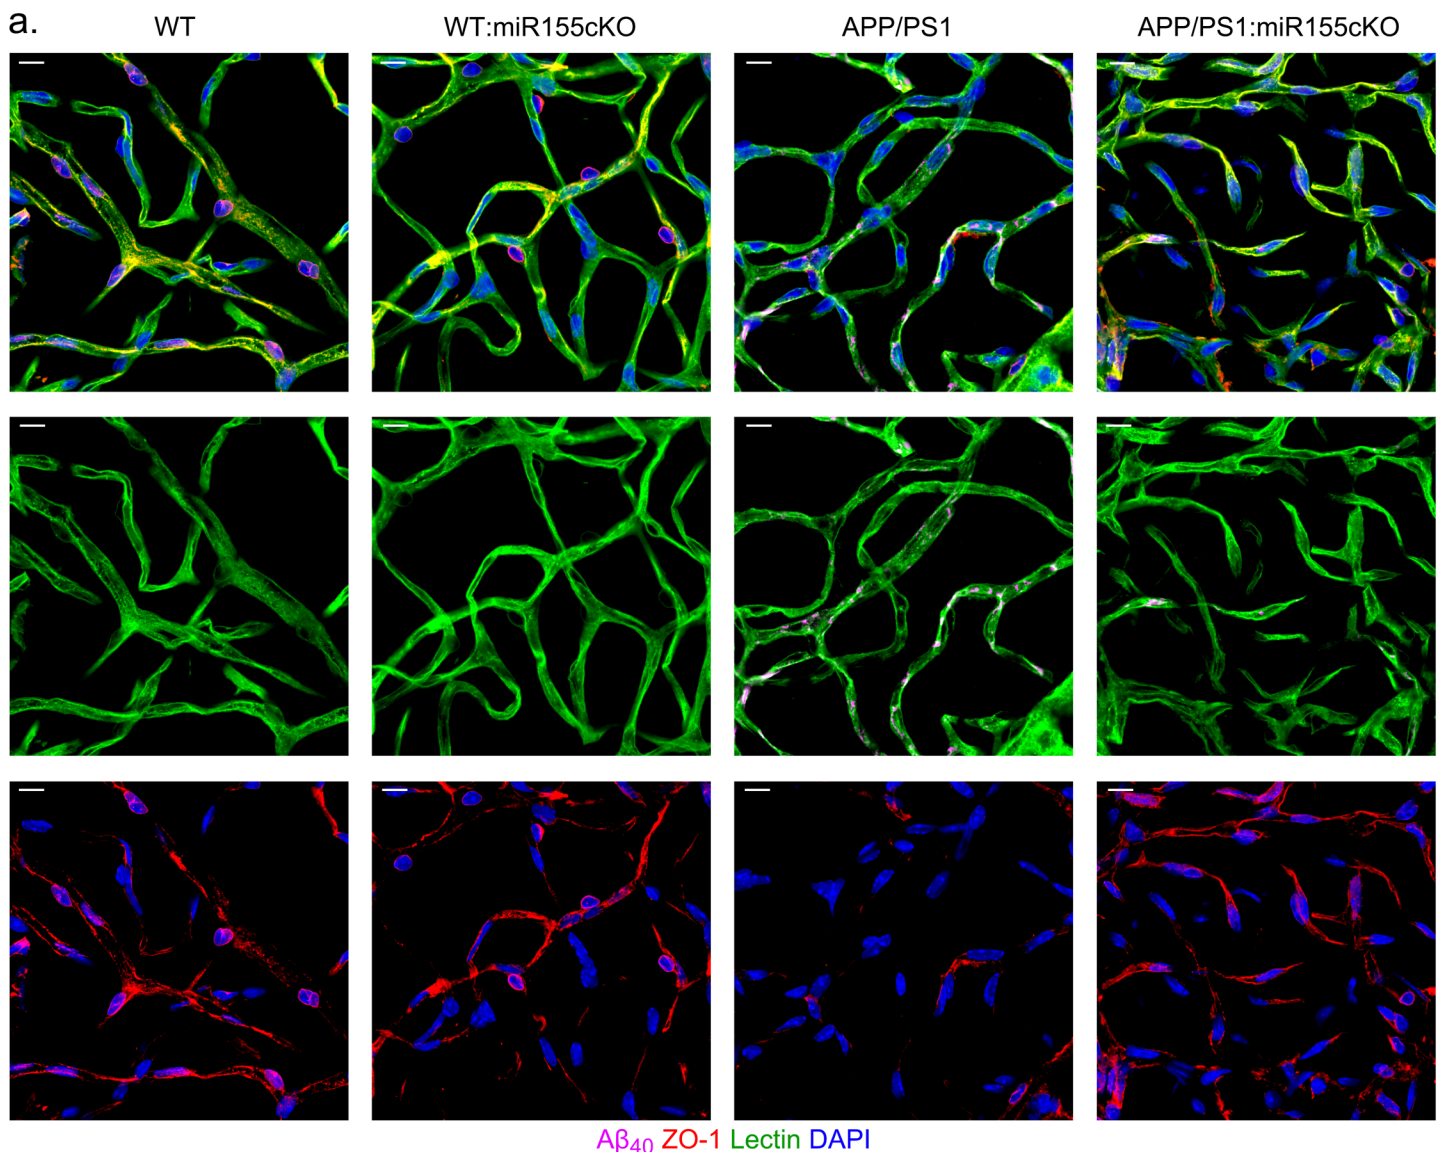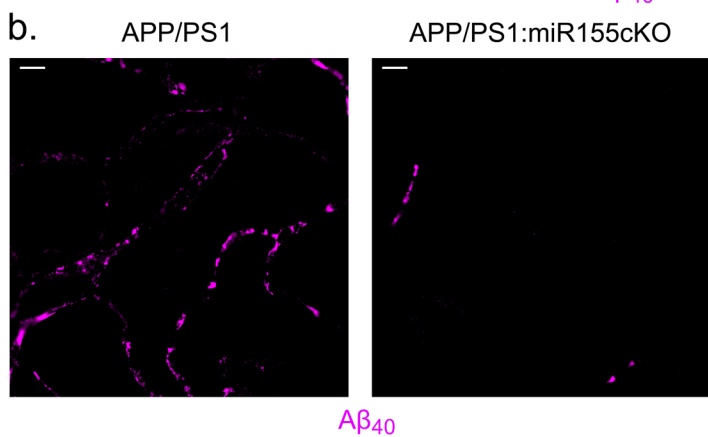

**Supplementary figure 8.** Extensive images and data analysis for retinal vascular ZO-1 and Aβ<sub>40</sub>. **a.** Representative images of immunofluorescent staining for 11A50-B10 of Aβ<sub>40</sub> (magenta), ZO-1 (red), lectin for blood vessels (green) and DAPI (blue) on isolate retinal blood vessels from all four genotypes of WT, WT:miR155cKO, APP/PS1, APP/PS1:miR155cKO at 8-month-old mouse age. Images were taken under 63x microscope objectives. Scale bars=10μm. **b.** Representative images only showing differences of retinal vascular Aβ<sub>40</sub>.

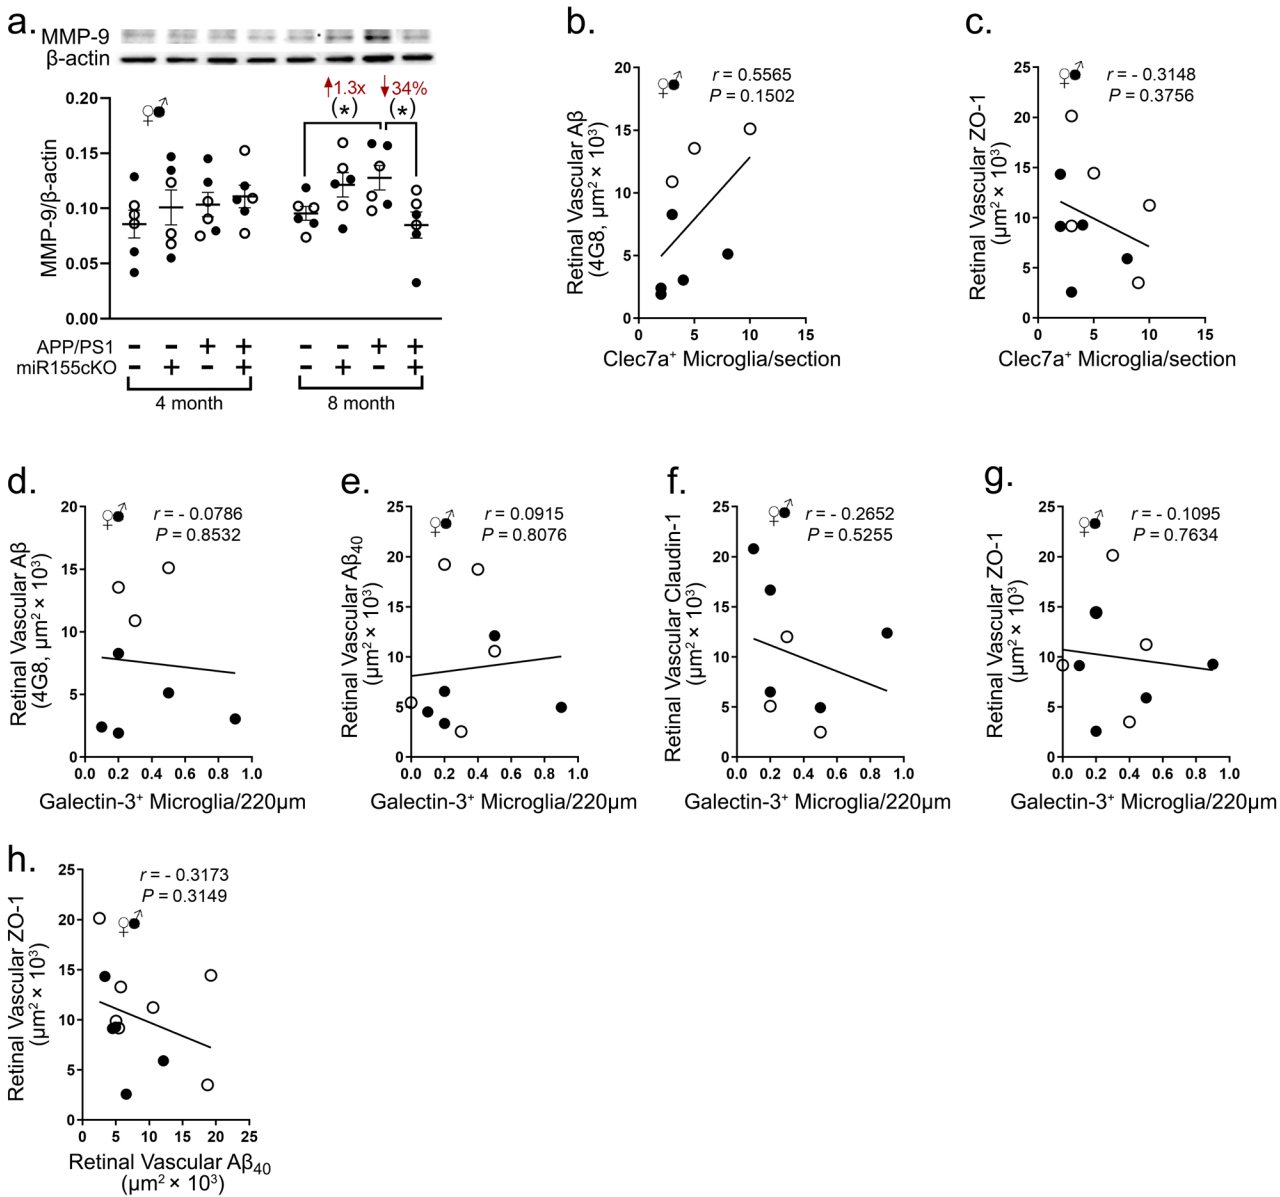

**Supplementary figure 9.** Supplementary data analyses for figure 5. **a.** Densitometric analysis of western-blotting protein bands of Mmp-9 normalized by  $\beta$ -actin control for retinal lysates from all experimental groups (total  $n=48$ ,  $n=6$  each group). **b-c.** Pearson's coefficient ( $r$ ) correlation between retinal Clec7a<sup>+</sup> microglia versus **b.** retinal vascular A $\beta$  immunoreactive area (IR) or **c.** retinal vascular ZO-1-IR. **d-g.** Pearson's coefficient ( $r$ ) correlation between Galectin-3<sup>+</sup> microglia versus **d.** retinal vascular A $\beta$ -IR, **e.** retinal vascular A $\beta$ 40-IR, **f.** retinal vascular claudin-1-IR, or **g.** retinal vascular ZO-1-IR. **h.** Pearson's coefficient ( $r$ ) correlation between retinal vascular ZO-1-IR versus retinal vascular A $\beta$ 40-IR. Data from individual mouse (circles) as well as group means  $\pm$  SEMs are shown. Black-filled circles represent males and clear circles represent females. \* $p < 0.05$ , by three-way ANOVA with Tukey's post-hoc multiple comparison test. Two group statistical analysis was performed using an unpaired 2-tailed Student t-test and is shown in parentheses. Fold changes and percentage decreases are shown in red.

**Table S1.** Mass spectrometry data showing significantly up-regulated proteins in 8-month-old APP/PS1:miR155cKO compared to APP/PS1 control group.

| Accession | Symbol  | Description                                                                             | APP/PS1:miR155cKO (Mean) | APP/PS1 (Mean) | FC   | p-value |
|-----------|---------|-----------------------------------------------------------------------------------------|--------------------------|----------------|------|---------|
| O54828-2  | RGS9    | Regulator of G-protein signaling 9-binding protein                                      | 8851.83                  | 5060.25        | 1.75 | 0.04294 |
| Q80XC6    | NRDE2   | Nuclear exosome regulator NRDE2                                                         | 37.74                    | 23.08          | 1.64 | 0.03696 |
| Q61012    | GNGT1   | Guanine nucleotide-binding protein G(T) subunit gamma-T1                                | 14957.02                 | 9400.30        | 1.59 | 0.04072 |
| Q8BMD6    | TM260   | Transmembrane protein 260                                                               | 366.84                   | 243.61         | 1.51 | 0.01259 |
| Q8BYK4    | RDH12   | Retinol dehydrogenase 12                                                                | 4665.08                  | 3182.26        | 1.47 | 0.00643 |
| Q3U4N2    | ICMT    | Protein-S-isoprenylcysteine O-methyltransferase                                         | 197.80                   | 135.79         | 1.46 | 0.02107 |
| G3X8W7    | CDC23   | Cell division cycle protein 23 homolog                                                  | 629.60                   | 434.31         | 1.45 | 0.03146 |
| Q8R2K4    | TAF6L   | TAF6-like RNA polymerase II p300/CBP-associated factor-associated factor 65 kDa subunit | 71.28                    | 49.22          | 1.45 | 0.00532 |
| Q8K245    | UVRAG   | UV radiation resistance-associated protein                                              | 46.84                    | 32.44          | 1.44 | 0.01872 |
| P61358    | RPL27   | 60S ribosomal protein L27                                                               | 3032.77                  | 2122.52        | 1.43 | 0.04167 |
| Q8BM55    | TMEM214 | Transmembrane protein 214                                                               | 82.86                    | 58.21          | 1.42 | 0.04954 |
| Q8BFV2    | PCID2   | PCI domain-containing protein 2                                                         | 152.91                   | 108.80         | 1.41 | 0.00188 |
| Q5XJY4    | PARL    | Presenilins-associated rhomboid-like protein, mitochondrial                             | 196.30                   | 141.04         | 1.39 | 0.03213 |
| Q99LC3    | NDUFA10 | NADH dehydrogenase [ubiquinone] 1 alpha subcomplex subunit 10, mitochondrial            | 2696.30                  | 1937.99        | 1.39 | 0.01325 |
| G3X8Y3    | NAA15   | N-alpha-acetyltransferase 15, NatA auxiliary subunit                                    | 1572.64                  | 1133.16        | 1.39 | 0.03190 |
| Q6ZQ38    | CAND1   | Cullin-associated NEDD8-dissociated protein 1                                           | 9306.35                  | 6710.49        | 1.39 | 0.00546 |
| Q9CPZ8    | CMC1    | COX assembly mitochondrial protein homolog                                              | 118.74                   | 86.49          | 1.37 | 0.01423 |
| Q9CQA1    | TRAPPC5 | Trafficking protein particle complex subunit 5                                          | 225.94                   | 166.91         | 1.35 | 0.00513 |
| Q9D0P0    | EBPL    | Emopamil-binding protein-like                                                           | 664.75                   | 491.31         | 1.35 | 0.02165 |
| Q8R1B4    | EIF3C   | Eukaryotic translation initiation factor 3 subunit C                                    | 3047.71                  | 2265.08        | 1.35 | 0.02359 |
| Q3TYD6    | LMTK2   | Serine/threonine-protein kinase LMTK2                                                   | 39.45                    | 29.46          | 1.34 | 0.00454 |
| Q9DC69    | NDUFA9  | NADH dehydrogenase [ubiquinone] 1 alpha subcomplex subunit 9, mitochondrial             | 8303.90                  | 6246.72        | 1.33 | 0.03466 |
| Q80U95    | UBE3C   | Ubiquitin-protein ligase E3C                                                            | 63.19                    | 48.02          | 1.32 | 0.03905 |
| P62702    | RPS4X   | 40S ribosomal protein S4, X isoform                                                     | 5196.95                  | 3951.23        | 1.32 | 0.04156 |
| Q8CDM8    | F16B1   | Protein FAM160B1                                                                        | 60.83                    | 46.33          | 1.31 | 0.04588 |
| P12970    | RPL7A   | 60S ribosomal protein L7a                                                               | 4934.32                  | 3778.63        | 1.31 | 0.04812 |



|            |          |                                                               |          |          |      |         |
|------------|----------|---------------------------------------------------------------|----------|----------|------|---------|
| P62751     | RPL23A   | 60S ribosomal protein L23a                                    | 3566.97  | 2738.22  | 1.30 | 0.02698 |
| O70152     | DPM1     | Dolichol-phosphate mannosyltransferase subunit 1              | 794.79   | 611.13   | 1.30 | 0.01654 |
| O89112     | LANCL1   | Glutathione S-transferase LANCL1                              | 400.42   | 308.60   | 1.30 | 0.04268 |
| Q7TPD0     | INTS3    | Integrator complex subunit 3                                  | 1017.51  | 784.33   | 1.30 | 0.01690 |
| Q8BWZ3     | NAA25    | N-alpha-acetyltransferase 25, NatB auxiliary subunit          | 431.52   | 334.86   | 1.29 | 0.01678 |
| Q3UR70     | TGFA1    | Transforming growth factor-beta receptor-associated protein 1 | 67.11    | 52.29    | 1.28 | 0.04711 |
| Q8R0X7     | SGPL1    | Sphingosine-1-phosphate lyase 1                               | 198.49   | 155.32   | 1.28 | 0.03852 |
| Q9WUD8     | FAIM1    | Fas apoptotic inhibitory molecule 1                           | 1715.47  | 1349.28  | 1.27 | 0.03736 |
| O70299     | MB211    | Putative nucleotidyltransferase MAB211L1                      | 553.40   | 436.13   | 1.27 | 0.02553 |
| Q9D6D0     | SLC25A27 | Solute carrier family 25, member 27                           | 273.69   | 215.91   | 1.27 | 0.02669 |
| P62843     | RPS15    | 40S ribosomal protein S15                                     | 893.84   | 715.94   | 1.25 | 0.04849 |
| Q91YM2     | RHG35    | Rho GTPase-activating protein 35                              | 160.72   | 128.76   | 1.25 | 0.04293 |
| Q9D5V5     | CUL5     | Cullin-5                                                      | 2704.15  | 2168.47  | 1.25 | 0.03624 |
| Q9CZV8-3   | FXL20    | Isoform 3 of F-box/LRR-repeat protein 20                      | 338.33   | 271.65   | 1.25 | 0.04389 |
| Q8QZY1     | EIF3L    | Eukaryotic translation initiation factor 3 subunit L          | 1963.54  | 1580.83  | 1.24 | 0.01515 |
| Q64511     | TOP2B    | DNA topoisomerase 2-beta                                      | 15998.51 | 12882.18 | 1.24 | 0.03723 |
| Q6A026     | PDS5A    | Sister chromatid cohesion protein PDS5 homolog A              | 370.11   | 300.00   | 1.23 | 0.00727 |
| P61222     | ABCE1    | ATP-binding cassette sub-family E member 1                    | 1422.15  | 1154.09  | 1.23 | 0.04248 |
| Q9CQZ5     | NDUA6    | NADH dehydrogenase [ubiquinone] 1 alpha subcomplex subunit 6  | 2672.37  | 2173.34  | 1.23 | 0.01228 |
| Q8BVY0     | RL1D1    | Ribosomal L1 domain-containing protein 1                      | 1488.27  | 1212.46  | 1.23 | 0.02636 |
| Q9D5V6     | SYAP1    | Synapse-associated protein 1                                  | 208.33   | 170.61   | 1.22 | 0.02340 |
| Q8BM39     | PRP18    | Pre-mRNA-splicing factor 18                                   | 117.18   | 96.09    | 1.22 | 0.00834 |
| Q9DB50     | AP1S2    | AP-1 complex subunit sigma-2                                  | 324.84   | 266.45   | 1.22 | 0.02109 |
| O08547     | SC22B    | Vesicle-trafficking protein SEC22b                            | 3138.28  | 2577.43  | 1.22 | 0.02976 |
| A0A0J9YUD5 | TMLH     | Nucleoporin 205                                               | 923.73   | 758.79   | 1.22 | 0.03733 |
| Q8C0C7     | SYFA     | Phenylalanine--tRNA ligase alpha subunit                      | 2675.69  | 2200.27  | 1.22 | 0.03388 |
| P62245     | RS15A    | 40S ribosomal protein S15a                                    | 3190.47  | 2634.39  | 1.21 | 0.02347 |
| Q99NB9     | SF3B1    | Splicing factor 3B subunit 1                                  | 6316.50  | 5215.61  | 1.21 | 0.02960 |
| Q9D517     | PLCC     | 1-acyl-sn-glycerol-3-phosphate acyltransferase gamma          | 6490.16  | 5388.21  | 1.20 | 0.02989 |
| Q9JHU4     | DYHC1    | Cytoplasmic dynein 1 heavy chain 1                            | 44521.14 | 36970.68 | 1.20 | 0.03566 |

APP/PS1, APP<sub>SWE</sub>/PS1<sub>L166P</sub> double transgenic mouse model of Alzheimer's disease (AD); APP/PS1:miR155cKO, Cx3cr1<sup>CreERT2</sup>-miR155<sup>fl/fl</sup>-APP/PS1 mice; FC, fold-change (FC>1.2 included); P<0.05

**Table S2.** Mass spectrometry data showing significantly down-regulated proteins in 8-month-old APP/PS1:miR155cKO compared to APP/PS1 control group.

| Accession | Symbol | Description                                                     | APP/PS1:miR155cKO (Mean) | APP/PS1 (Mean) | FC    | p-value |
|-----------|--------|-----------------------------------------------------------------|--------------------------|----------------|-------|---------|
| P28481    | CO2A1  | Collagen alpha-1(II) chain                                      | 44.12                    | 76.28          | -1.73 | 0.00601 |
| Q91WE6    | CDKAL  | Threonylcarbamoyladenosine tRNA methylthiotransferase           | 16.53                    | 27.70          | -1.68 | 0.01085 |
| Q99PH1    | LRRC4  | Leucine-rich repeat-containing protein 4                        | 86.53                    | 135.16         | -1.56 | 0.00702 |
| Q6P6M7    | SPCS   | O-phosphoseryl-tRNA(Sec) selenium transferase                   | 28.43                    | 44.01          | -1.55 | 0.04470 |
| Q3UOL2    | AN33B  | Ankyrin repeat domain-containing protein 33B                    | 485.82                   | 733.96         | -1.51 | 0.02989 |
| P49935    | CATH   | Pro-cathepsin H                                                 | 411.93                   | 619.70         | -1.50 | 0.00715 |
| Q8VC52    | RBPS2  | RNA-binding protein with multiple splicing 2                    | 258.17                   | 387.33         | -1.50 | 0.02890 |
| Q3UHH1    | ZSWM8  | Zinc finger SWIM domain-containing protein 8                    | 43.33                    | 63.59          | -1.47 | 0.02009 |
| Q6WKZ8    | UBR2   | E3 ubiquitin-protein ligase UBR2                                | 74.67                    | 108.25         | -1.45 | 0.00218 |
| Q8BUV6    | LSM11  | U7 snRNA-associated Sm-like protein LSM11                       | 18.25                    | 26.41          | -1.45 | 0.03990 |
| Q8BG47    | RN152  | E3 ubiquitin-protein ligase RNF152                              | 42.95                    | 62.00          | -1.44 | 0.03070 |
| Q9WV91    | FPRP   | Prostaglandin F2 receptor negative regulator                    | 73.12                    | 105.16         | -1.44 | 0.02023 |
| P97490    | ADCY8  | Adenylate cyclase type 8                                        | 411.72                   | 590.54         | -1.43 | 0.02513 |
| A2A699    | F1712  | Protein FAM171A2                                                | 82.29                    | 117.94         | -1.43 | 0.02946 |
| O55026    | ENTP2  | Ectonucleoside triphosphate diphosphohydrolase 2                | 213.30                   | 305.52         | -1.43 | 0.03235 |
| P51569    | AGAL   | Alpha-galactosidase A                                           | 77.16                    | 110.33         | -1.43 | 0.02706 |
| Q61627    | GRID1  | Glutamate receptor ionotropic, delta-1                          | 44.36                    | 62.51          | -1.41 | 0.04852 |
| Q9CQP3    | CHCH5  | Coiled-coil-helix-coiled-coil-helix domain-containing protein 5 | 79.75                    | 112.16         | -1.41 | 0.02656 |
| Q761V0    | SC6A5  | Sodium- and chloride-dependent glycine transporter 2            | 111.57                   | 154.10         | -1.38 | 0.02882 |
| Q9CQN7    | RM41   | 39S ribosomal protein L41, mitochondrial                        | 371.61                   | 506.55         | -1.36 | 0.02811 |
| Q6PGH2    | JUPI2  | Jupiter microtubule associated homolog 2                        | 144.91                   | 196.52         | -1.36 | 0.01978 |
| Q61247    | A2AP   | Alpha-2-antiplasmin                                             | 143.29                   | 192.69         | -1.34 | 0.01873 |
| Q8VCQ3    | NRBF2  | Nuclear receptor-binding factor 2                               | 35.26                    | 47.36          | -1.34 | 0.00214 |
| P43274    | H14    | Histone H1.4                                                    | 15743.48                 | 21052.68       | -1.34 | 0.04002 |
| Q9D937    | CK098  | Uncharacterized protein C11orf98 homolog                        | 663.51                   | 871.72         | -1.31 | 0.02661 |
| P01864    | GCAB   | Ig gamma-2A chain C region secreted form                        | 143.83                   | 188.42         | -1.31 | 0.01078 |
| Q6KAU4    | MB12B  | Multivesicular body subunit 12B                                 | 48.45                    | 63.30          | -1.31 | 0.04273 |

|          |        |                                                   |        |         |       |         |
|----------|--------|---------------------------------------------------|--------|---------|-------|---------|
| Q62470-2 | ITA3   | Isoform 2 of Integrin alpha-3                     | 209.21 | 272.95  | -1.30 | 0.01935 |
| Q60841   | RELN   | Reelin                                            | 165.11 | 215.32  | -1.30 | 0.01426 |
| Q91XF0   | PNPO   | Pyridoxine-5'-phosphate oxidase                   | 133.64 | 173.68  | -1.30 | 0.03187 |
| Q08481   | PECA1  | Platelet endothelial cell adhesion molecule       | 38.24  | 49.25   | -1.29 | 0.04796 |
| P55200   | KMT2A  | Histone-lysine N-methyltransferase 2A             | 96.64  | 123.98  | -1.28 | 0.00616 |
| Q8VEH2   | Q8VEH2 | CDKN1A-interacting zinc finger protein 1          | 159.10 | 202.61  | -1.27 | 0.04636 |
| Q9QZB0   | RGS17  | Regulator of G-protein signaling 17               | 99.50  | 126.50  | -1.27 | 0.03956 |
| P50171-2 | DHB8   | Isoform Long of Estradiol 17-beta-dehydrogenase 8 | 895.48 | 1134.37 | -1.27 | 0.01952 |
| Q8CIF4   | BTD    | Biotinidase                                       | 64.72  | 81.80   | -1.26 | 0.00647 |
| Q9CY73   | RM44   | 39S ribosomal protein L44, mitochondrial          | 117.17 | 147.76  | -1.26 | 0.03149 |
| Q8R205   | ZC3HA  | Zinc finger CCCH domain-containing protein 10     | 53.96  | 67.72   | -1.26 | 0.03078 |

APP/PS1, APP<sub>SWE</sub>/PS1<sub>L166P</sub> double transgenic mouse model of Alzheimer's disease (AD); APP/PS1:miR155cKO, Cx3cr1<sup>CreERT2</sup>-miR155<sup>fl/fl</sup>-APP/PS1 mice; FC, fold-change (FC>1.2 included); *P*<0.05



**Table S3.** Mass spectrometry data showing significantly up-regulated proteins in 8-month-old WT:miR155cKO compared to WT control group.

| Accession | Symbol | Description                                                          | WT:miR155cKO (Mean) | WT (Mean) | FC   | p-value |
|-----------|--------|----------------------------------------------------------------------|---------------------|-----------|------|---------|
| Q8BVZ5    | IL33   | Interleukin-33                                                       | 38.03               | 22.04     | 1.73 | 0.00995 |
| Q9CPR5    | RM15   | 39S ribosomal protein L15, mitochondrial                             | 228.26              | 147.36    | 1.55 | 0.00572 |
| Q99LH4    | ZN672  | Zinc finger protein 672                                              | 79.05               | 55.09     | 1.43 | 0.01621 |
| Q7TPD0    | INT3   | Integrator complex subunit 3                                         | 1183.38             | 832.01    | 1.42 | 0.01156 |
| P61358    | RL27   | 60S ribosomal protein L27                                            | 2821.01             | 2016.36   | 1.40 | 0.02475 |
| Q91YU8    | SSF1   | Suppressor of SWI4 1 homolog                                         | 57.93               | 43.05     | 1.35 | 0.02264 |
| Q6A0A2    | LAR4B  | La-related protein 4B                                                | 279.61              | 210.69    | 1.33 | 0.04240 |
| Q64511    | TOP2B  | DNA topoisomerase 2-beta                                             | 15693.44            | 11904.76  | 1.32 | 0.04752 |
| F6Q1V8    | F6Q1V8 | FRY-like transcription coactivator (Fragment)                        | 273.80              | 208.95    | 1.31 | 0.02230 |
| B2RX14    | TUT4   | Terminal uridylyltransferase 4                                       | 26.68               | 20.78     | 1.28 | 0.04087 |
| Q8BX57    | PXK    | PX domain-containing protein kinase-like protein                     | 72.88               | 57.73     | 1.26 | 0.00521 |
| Q8BVY0    | RL1D1  | Ribosomal L1 domain-containing protein 1                             | 1474.68             | 1177.59   | 1.25 | 0.02007 |
| Q8K205    | Q8K205 | Processing of 1, ribonuclease P/MRP family, ( <i>S. cerevisiae</i> ) | 218.75              | 175.36    | 1.25 | 0.00881 |
| Q9JHW4    | SELB   | Selenocysteine-specific elongation factor                            | 157.35              | 126.42    | 1.24 | 0.01830 |
| Q5XJF6    | Q5XJF6 | Ribosomal protein                                                    | 2132.84             | 1715.17   | 1.24 | 0.03475 |
| Q689Z5-2  | SBNO1  | Isoform 2 of Protein strawberry notch homolog 1                      | 162.27              | 131.41    | 1.23 | 0.01316 |
| P56960    | EXOSX  | Exosome component 10                                                 | 1275.44             | 1037.48   | 1.23 | 0.01788 |
| Q9EQC5    | SCYL1  | N-terminal kinase-like protein                                       | 143.04              | 116.46    | 1.23 | 0.00662 |
| Q0VGB7    | PP4R2  | Serine/threonine-protein phosphatase 4 regulatory subunit 2          | 1133.28             | 925.46    | 1.22 | 0.02356 |
| P14131    | RS16   | 40S ribosomal protein S16                                            | 3654.43             | 2987.11   | 1.22 | 0.03376 |
| Q6KCD5    | NIPBL  | Nipped-B-like protein                                                | 470.37              | 384.57    | 1.22 | 0.04458 |
| P62702    | RS4X   | 40S ribosomal protein S4, X isoform                                  | 5279.36             | 4321.45   | 1.22 | 0.03280 |
| Q9QZW9    | MNX1   | Motor neuron and pancreas homeobox protein 1                         | 515.65              | 422.11    | 1.22 | 0.01288 |
| Q91W96    | APC4   | Anaphase-promoting complex subunit 4                                 | 52.89               | 43.65     | 1.21 | 0.03643 |
| B7ZMP1    | XPP3   | Xaa-Pro aminopeptidase 3                                             | 207.61              | 172.86    | 1.20 | 0.00990 |
| Q9D787    | PPIL2  | RING-type E3 ubiquitin-protein ligase PPIL2                          | 221.11              | 184.11    | 1.20 | 0.00512 |
| Q0VBD0    | ITB8   | Integrin beta-8 OS=Mus musculus OX=10090 GN=Itgb8 PE=1 SV=1          | 437.17              | 365.22    | 1.20 | 0.03026 |

WT, wild type mice; WT:miR155cKO, Cx3cr1<sup>CreERT2</sup>-miR155<sup>fl/fl</sup>-WT mice; FC, fold-change (FC>1.2 included); P<0.05

**Table S4.** Mass spectrometry data showing significantly down-regulated proteins in 8-month-old WT:miR155cKO compared to WT control group.

| Accession | Symbol | Description                                                                     | WT:miR155cKO (Mean) | WT (Mean) | FC    | p-value |
|-----------|--------|---------------------------------------------------------------------------------|---------------------|-----------|-------|---------|
| Q6P5D4    | CP135  | Centrosomal protein of 135 kDa                                                  | 83.81               | 144.63    | -1.73 | 0.03285 |
| Q69ZS0    | PZRN3  | ####E3 ubiquitin-protein ligase PDZRN3                                          | 41.59               | 65.86     | -1.58 | 0.03238 |
| Q9WV35    | ABEC2  | C->U-editing enzyme APOBEC-2                                                    | 148.64              | 233.48    | -1.57 | 0.04232 |
| E9Q8Q6    | E9Q8Q6 | Coiled-coil domain-containing 141                                               | 80.02               | 121.60    | -1.52 | 0.02116 |
| Q61733    | RT31   | 28S ribosomal protein S31, mitochondrial                                        | 64.82               | 94.61     | -1.46 | 0.02353 |
| A9Z1V5    | VW5B1  | von Willebrand factor A domain-containing protein 5B1                           | 267.73              | 381.46    | -1.42 | 0.00985 |
| Q80SY4    | MIB1   | E3 ubiquitin-protein ligase MIB1                                                | 136.75              | 189.77    | -1.39 | 0.04529 |
| Q8VHW4    | CCG5   | Voltage-dependent calcium channel gamma-5 subunit                               | 217.67              | 301.66    | -1.39 | 0.00429 |
| Q9R1V7-3  | ADA23  | Isoform Gamma of Disintegrin and metalloproteinase domain-containing protein 23 | 16.78               | 23.20     | -1.38 | 0.03426 |
| Q91WE6    | CDKAL  | Threonylcarbamoyladenosine tRNA methylthiotransferase                           | 16.13               | 21.26     | -1.32 | 0.00727 |
| O70338    | RNH1   | Ribonuclease H1                                                                 | 15.77               | 20.68     | -1.31 | 0.04195 |
| P47743    | GRM8   | Metabotropic glutamate receptor 8                                               | 66.13               | 86.48     | -1.31 | 0.02860 |
| P28798    | GRN    | Progranulin                                                                     | 266.18              | 346.36    | -1.30 | 0.04441 |
| O08688    | CAN5   | Calpain-5                                                                       | 45.89               | 59.29     | -1.29 | 0.00300 |
| Q923D4    | SF3B5  | Splicing factor 3B subunit 5                                                    | 295.49              | 378.23    | -1.28 | 0.02634 |
| P06797    | CATL1  | Cathepsin L1                                                                    | 93.01               | 118.68    | -1.28 | 0.01101 |
| Q61069    | USF1   | Upstream stimulatory factor 1                                                   | 162.98              | 207.45    | -1.27 | 0.00629 |
| P40237    | CD82   | CD82 antigen                                                                    | 253.29              | 321.42    | -1.27 | 0.02717 |
| Q9DCN1    | NUDT12 | Peroxisomal NADH pyrophosphatase NUDT12                                         | 38.06               | 48.26     | -1.27 | 0.01094 |
| Q9EPR2    | PG12A  | Group XIIA secretory phospholipase A2                                           | 57.92               | 73.33     | -1.27 | 0.02601 |
| Q6NVE9    | PPTC7  | Protein phosphatase PTC7 homolog                                                | 57.50               | 72.65     | -1.26 | 0.04822 |
| Q8BGX3    | LRTM2  | Leucine-rich repeat and transmembrane domain-containing protein 2               | 92.22               | 116.28    | -1.26 | 0.03734 |
| Q78JW9    | UBFD1  | Ubiquitin domain-containing protein UBFD1                                       | 123.38              | 155.51    | -1.26 | 0.00201 |

WT, wild type mice; WT:miR155cKO, Cx3cr1<sup>CreERT2</sup>-miR155<sup>fl/fl</sup>-WT mice; FC, fold-change (FC>1.2 included); P<0.05

**Table S5.** Mass spectrometry data showing significantly up-regulated proteins in 4-month-old APP/PS1:miR155cKO compared to APP/PS1 control group.

| Accession  | Symbol     | Description                                                 | APP/PS1:miR155cKO (Mean) | APP/PS1 (Mean) | FC   | p-value |
|------------|------------|-------------------------------------------------------------|--------------------------|----------------|------|---------|
| Q8BWY4     | MBLC1      | Metallo-beta-lactamase domain-containing protein 1          | 442.86                   | 76.73          | 5.77 | 0.02211 |
| Q9R269     | PEPL       | Periplakin                                                  | 198.12                   | 43.20          | 4.59 | 0.04968 |
| Q8R1E7     | TM234      | Transmembrane protein 234                                   | 29.70                    | 16.10          | 1.84 | 0.02661 |
| E9Q394     | AKP13      | A-kinase anchor protein 13                                  | 102.40                   | 58.26          | 1.76 | 0.00813 |
| Q9D0B6     | PBDC1      | Protein PBDC1                                               | 84.14                    | 54.41          | 1.55 | 0.02585 |
| Q14B01     | Q14B01     | Ring finger protein 113A2                                   | 52.79                    | 35.69          | 1.48 | 0.01826 |
| P26350     | PTMA       | Prothymosin alpha                                           | 558.54                   | 378.10         | 1.48 | 0.04257 |
| Q5U901     | CBPA6      | Carboxypeptidase A6                                         | 848.75                   | 611.95         | 1.39 | 0.03097 |
| P63046     | ST4A1      | Sulfotransferase 4A1                                        | 73.67                    | 54.01          | 1.36 | 0.00116 |
| Q69Z89     | RADIL      | Ras-associating and dilute domain-containing protein        | 116.69                   | 86.30          | 1.35 | 0.00796 |
| Q8C5R2     | PRSR2      | Proline and serine-rich protein 2                           | 42.08                    | 31.66          | 1.33 | 0.03895 |
| Q7TPD0     | INT3       | Integrator complex subunit 3                                | 1231.32                  | 930.44         | 1.32 | 0.00704 |
| Q3TMH2     | SCRN3      | Secernin-3                                                  | 438.51                   | 332.43         | 1.32 | 0.01205 |
| Q8BGQ1     | SPE39      | Spermatogenesis-defective protein 39 homolog                | 66.15                    | 50.16          | 1.32 | 0.03753 |
| Q9Z2L7     | CRLF3      | Cytokine receptor-like factor 3                             | 376.73                   | 285.88         | 1.32 | 0.00720 |
| Q8VCA8     | SCRN2      | Secernin-2                                                  | 385.39                   | 292.63         | 1.32 | 0.03366 |
| A0A087WPA0 | A0A087WPA0 | LBH domain-containing 1                                     | 348.98                   | 267.56         | 1.30 | 0.04470 |
| Q71FD5     | ZNRF2      | E3 ubiquitin-protein ligase ZNRF2                           | 66.46                    | 51.21          | 1.30 | 0.01927 |
| Q8K2X3     | STN1       | CST complex subunit STN1                                    | 146.67                   | 113.09         | 1.30 | 0.00615 |
| O88848-2   | ARL6       | Isoform 2 of ADP-ribosylation factor-like protein 6         | 359.40                   | 279.05         | 1.29 | 0.02837 |
| P70677     | CASP3      | Caspase-3                                                   | 216.81                   | 169.01         | 1.28 | 0.00197 |
| Q9D720     | NSE1       | Non-structural maintenance of chromosomes element 1 homolog | 34.46                    | 26.97          | 1.28 | 0.00325 |
| Q99PM3     | TF2AA      | Transcription initiation factor IIA subunit 1               | 203.78                   | 159.73         | 1.28 | 0.04603 |
| Q91WU5     | AS3MT      | Arsenite methyltransferase                                  | 615.22                   | 485.20         | 1.27 | 0.03591 |
| Q9DBX2     | PHLP       | Phosducin-like protein                                      | 2513.16                  | 1983.54        | 1.27 | 0.02516 |

|        |        |                                                                      |         |         |      |         |
|--------|--------|----------------------------------------------------------------------|---------|---------|------|---------|
| Q9CQG2 | MET16  | RNA N6-adenosine-methyltransferase METTL16                           | 158.38  | 125.25  | 1.26 | 0.01893 |
| Q9JMA2 | TGT    | Queuine tRNA-ribosyltransferase catalytic subunit 1                  | 50.92   | 40.47   | 1.26 | 0.00739 |
| Q9D0U6 | MAF1   | Repressor of RNA polymerase III transcription MAF1 homolog           | 47.41   | 37.82   | 1.25 | 0.02360 |
| Q8VCN5 | CGL    | Cystathionine gamma-lyase                                            | 64.71   | 51.76   | 1.25 | 0.04127 |
| P56375 | ACYP2  | Acylphosphatase-2                                                    | 968.73  | 777.72  | 1.25 | 0.04660 |
| Q8CAY6 | THIC   | Acetyl-CoA acetyltransferase, cytosolic                              | 1231.47 | 995.93  | 1.24 | 0.01023 |
| Q69ZC8 | GPAM1  | GPALPP motifs-containing protein 1                                   | 103.69  | 83.90   | 1.24 | 0.00555 |
| Q8BH58 | TIPRL  | TIP41-like protein                                                   | 408.89  | 332.74  | 1.23 | 0.03517 |
| F6U3S2 | F6U3S2 | Major facilitator superfamily domain-containing protein 6 (Fragment) | 24.60   | 20.06   | 1.23 | 0.04139 |
| Q9Z0E6 | GBP2   | Guanylate-binding protein 2                                          | 208.60  | 170.27  | 1.23 | 0.03265 |
| P13439 | UMPS   | Uridine 5'-monophosphate synthase                                    | 458.14  | 374.54  | 1.22 | 0.04080 |
| Q9JKX6 | NUDT5  | ADP-sugar pyrophosphatase                                            | 195.90  | 160.53  | 1.22 | 0.03898 |
| Q9CXU9 | EIF1B  | Eukaryotic translation initiation factor 1b                          | 121.63  | 99.94   | 1.22 | 0.01180 |
| Q8CHX7 | RFTN2  | Raftlin-2                                                            | 124.32  | 102.53  | 1.21 | 0.02000 |
| Q5SYD0 | MYO1D  | Unconventional myosin-1d                                             | 64.96   | 53.58   | 1.21 | 0.03288 |
| Q8BP27 | SFR1   | Swi5-dependent recombination DNA repair protein 1 homolog            | 317.44  | 262.59  | 1.21 | 0.03327 |
| Q9D967 | MGBP1  | Magnesium-dependent phosphatase 1                                    | 464.61  | 385.11  | 1.21 | 0.04149 |
| Q3UIK4 | MET14  | N6-adenosine-methyltransferase non-catalytic subunit                 | 175.64  | 146.06  | 1.20 | 0.02770 |
| A2RTH5 | A2RTH5 | Leucine carboxyl methyltransferase 1                                 | 162.44  | 135.15  | 1.20 | 0.01194 |
| Q8C8T7 | ELFN1  | Protein ELFN1                                                        | 346.67  | 288.53  | 1.20 | 0.01441 |
| O88271 | CFDP1  | Craniofacial development protein 1                                   | 3406.87 | 2837.86 | 1.20 | 0.02677 |

APP/PS1, APP<sub>SWE</sub>/PS1<sub>L166P</sub> double transgenic mouse model of Alzheimer's disease (AD); APP/PS1:miR155cKO, Cx3cr1<sup>CreERT2</sup>-miR155<sup>fl/fl</sup>-APP/PS1 mice; FC, fold-change (FC>1.2 included); *P*<0.05



**Table S6.** Mass spectrometry data showing significantly down-regulated proteins in 4-month-old APP/PS1:miR155cKO compared to APP/PS1 control group.

| Accession  | Symbol     | Description                                                           | APP/PS1:miR155cKO (Mean) | APP/PS1 (Mean) | FC    | p-value |
|------------|------------|-----------------------------------------------------------------------|--------------------------|----------------|-------|---------|
| Q7TN83     | SYT16      | Synaptotagmin-16                                                      | 184.40                   | 602.72         | -3.27 | 0.01298 |
| Q9D2X5     | SCC4       | MAU2 chromatid cohesion factor homolog                                | 85.09                    | 139.83         | -1.64 | 0.03511 |
| P18608     | HMGN1      | Non-histone chromosomal protein HMG-14                                | 8915.34                  | 14037.37       | -1.57 | 0.03493 |
| Q91YE9     | 5NT1B      | Cytosolic 5'-nucleotidase 1B                                          | 199.83                   | 280.03         | -1.40 | 0.02562 |
| Q9DB42     | ZN593      | Zinc finger protein 593                                               | 111.88                   | 154.71         | -1.38 | 0.03722 |
| G5E8C2     | G5E8C2     | Kelch repeat and BTB (POZ) domain-containing 7                        | 25.27                    | 34.35          | -1.36 | 0.01911 |
| B9EHJ3     | B9EHJ3     | Tight junction protein ZO-1                                           | 3495.70                  | 4708.87        | -1.35 | 0.04857 |
| E9PX29     | E9PX29     | Spectrin beta chain                                                   | 73.42                    | 97.04          | -1.32 | 0.00763 |
| Q5SXC4     | Q5SXC4     | Vascular endothelial zinc finger 1                                    | 846.07                   | 1110.48        | -1.31 | 0.01479 |
| Q9EPR2     | PG12A      | Group XIIA secretory phospholipase A2                                 | 57.63                    | 75.54          | -1.31 | 0.00205 |
| Q9CWW7     | CXXC1      | CXXC-type zinc finger protein 1                                       | 32.58                    | 42.54          | -1.31 | 0.00275 |
| Q9CRB2     | NHP2       | H/ACA ribonucleoprotein complex subunit 2                             | 471.12                   | 603.99         | -1.28 | 0.04380 |
| Q6PGH1     | BUD31      | Protein BUD31 homolog                                                 | 901.97                   | 1153.81        | -1.28 | 0.01020 |
| P28798     | GRN        | Progranulin                                                           | 275.44                   | 349.27         | -1.27 | 0.00270 |
| Q8R2Y9     | SOSB1      | SOSS complex subunit B1                                               | 258.92                   | 328.24         | -1.27 | 0.02765 |
| A0A1L1STD6 | A0A1L1STD6 | InaF motif-containing 2                                               | 70.15                    | 88.50          | -1.26 | 0.02397 |
| Q9CR59     | G45IP      | Growth arrest and DNA damage-inducible proteins-interacting protein 1 | 101.78                   | 127.96         | -1.26 | 0.02262 |
| Q61072     | ADAM9      | Disintegrin and metalloproteinase domain-containing protein 9         | 110.56                   | 138.73         | -1.25 | 0.04969 |
| Q99MI1     | RB6I2      | ELKS/Rab6-interacting/CAST family member 1                            | 1080.81                  | 1350.66        | -1.25 | 0.01304 |
| P62307     | RUXF       | Small nuclear ribonucleoprotein F                                     | 616.97                   | 771.00         | -1.25 | 0.02214 |
| Q8R149     | BUD13      | BUD13 homolog                                                         | 128.97                   | 160.69         | -1.25 | 0.04688 |
| Q6ZQ58     | LARP1      | La-related protein 1                                                  | 137.16                   | 170.86         | -1.25 | 0.03675 |

APP/PS1, APP<sub>SWE</sub>/PS1<sub>L166P</sub> double transgenic mouse model of Alzheimer's disease (AD); APP/PS1:miR155cKO, Cx3cr1<sup>CreERT2</sup>-miR155<sup>fl/fl</sup>-APP/PS1 mice; FC, fold-change (FC>1.2 included); P<0.05

**Table S7.** Mass spectrometry data showing significantly up-regulated proteins in 4-month-old WT:miR155cKO compared to WT control group.

| Accession | Symbol | Description                                                                   | WT cKOmiR155 (Mean) | WT (Mean) | FC   | p-value |
|-----------|--------|-------------------------------------------------------------------------------|---------------------|-----------|------|---------|
| Q8C6D4    | BEND5  | BEN domain-containing protein 5                                               | 1029.07             | 627.06    | 1.64 | 0.04189 |
| Q8BTI9    | PK3CB  | Phosphatidylinositol 4,5-bisphosphate 3-kinase catalytic subunit beta isoform | 1450.72             | 917.96    | 1.58 | 0.04940 |
| Q8R2N0    | TAP26  | Thyroid transcription factor 1-associated protein 26                          | 343.63              | 229.46    | 1.50 | 0.00576 |
| Q8K4S1    | PLCE1  | 1-phosphatidylinositol 4,5-bisphosphate phosphodiesterase epsilon-1           | 40.10               | 27.33     | 1.47 | 0.04304 |
| Q9EPQ2    | RPGR1  | X-linked retinitis pigmentosa GTPase regulator-interacting protein 1          | 94.36               | 66.11     | 1.43 | 0.04276 |
| Q66JT5    | TPGS2  | Tubulin polyglutamylase complex subunit 2                                     | 68.77               | 48.57     | 1.42 | 0.00104 |
| G3UW87    | G3UW87 | #####Predicted gene, 17455                                                    | 362.86              | 260.30    | 1.39 | 0.02261 |
| Q64518    | AT2A3  | Sarcoplasmic/endoplasmic reticulum calcium ATPase 3                           | 242.86              | 174.55    | 1.39 | 0.02434 |
| Q8BGZ2    | F168A  | Protein FAM168A                                                               | 350.45              | 258.03    | 1.36 | 0.03473 |
| P97318    | DAB1   | Disabled homolog 1                                                            | 66.58               | 49.18     | 1.35 | 0.02041 |
| Q9D903    | EBP2   | Probable rRNA-processing protein EBP2                                         | 501.79              | 373.16    | 1.34 | 0.02507 |
| Q60953    | PML    | Protein PML                                                                   | 69.61               | 53.00     | 1.31 | 0.03010 |
| Q3TZX8    | NOL9   | Polynucleotide 5'-hydroxyl-kinase NOL9                                        | 66.08               | 50.47     | 1.31 | 0.01111 |
| Q60875    | ARHG2  | Rho guanine nucleotide exchange factor 2                                      | 54.18               | 41.41     | 1.31 | 0.02822 |
| Q8R1F0    | L10K   | Leydig cell tumor 10 kDa protein homolog                                      | 1430.08             | 1096.18   | 1.30 | 0.01026 |
| Q7TNM2    | TRI46  | Tripartite motif-containing protein 46                                        | 31.01               | 23.96     | 1.29 | 0.01015 |
| Q8VIJ8    | NPRL3  | GATOR complex protein NPRL3                                                   | 17.88               | 13.88     | 1.29 | 0.00150 |
| O88622    | PARG   | Poly(ADP-ribose) glycohydrolase                                               | 111.35              | 87.25     | 1.28 | 0.00952 |
| Q9D1B9    | RM28   | 39S ribosomal protein L28, mitochondrial                                      | 151.54              | 118.86    | 1.27 | 0.00428 |
| Q99MS3    | MP17L  | Mpv17-like protein                                                            | 184.34              | 145.91    | 1.26 | 0.03608 |
| A6PWY4    | WDR76  | WD repeat-containing protein 76                                               | 38.06               | 30.15     | 1.26 | 0.03620 |
| Q9QZ47    | TNNT3  | Troponin T, fast skeletal muscle                                              | 265.43              | 211.10    | 1.26 | 0.01216 |
| E9Q1U1    | CC171  | #####Isoform 2 of Coiled-coil domain-containing protein 171                   | 413.97              | 329.28    | 1.26 | 0.01324 |
| Q5BL07    | PEX1   | Peroxisome biogenesis factor 1                                                | 82.85               | 65.94     | 1.26 | 0.03727 |
| E9PX29    | E9PX29 | Spectrin beta chain                                                           | 97.24               | 77.75     | 1.25 | 0.00262 |

|        |        |                                                                                   |         |         |      |         |
|--------|--------|-----------------------------------------------------------------------------------|---------|---------|------|---------|
| Q9DCU6 | RM04   | 39S ribosomal protein L4, mitochondrial                                           | 171.36  | 137.34  | 1.25 | 0.00424 |
| Q8BWS5 | GRIN3  | G protein-regulated inducer of neurite outgrowth 3                                | 210.07  | 168.73  | 1.24 | 0.02071 |
| Q9R118 | HTRA1  | Serine protease HTRA1                                                             | 57.22   | 46.14   | 1.24 | 0.00562 |
| F2Z3U3 | F2Z3U3 | Ras association (RalGDS/AF-6) and pleckstrin homology domains 1                   | 149.35  | 120.80  | 1.24 | 0.02219 |
| Q99PJ1 | PCD15  | Protocadherin-15                                                                  | 73.63   | 59.62   | 1.23 | 0.04482 |
| P97789 | XRN1   | 5'-3' exoribonuclease 1                                                           | 101.78  | 82.43   | 1.23 | 0.01737 |
| Q8C3X8 | LMF2   | Lipase maturation factor 2                                                        | 65.43   | 53.01   | 1.23 | 0.01938 |
| B9EHJ3 | B9EHJ3 | Tight junction protein ZO-1                                                       | 4876.67 | 3953.52 | 1.23 | 0.03428 |
| Q68FM7 | Q68FM7 | Rho guanine nucleotide exchange factor (GEF) 11                                   | 398.36  | 323.85  | 1.23 | 0.00563 |
| Q5SU73 | COIL   | Coilin                                                                            | 349.34  | 284.39  | 1.23 | 0.03945 |
| Q8VC66 | ADIP   | Afadin- and alpha-actinin-binding protein                                         | 81.80   | 66.94   | 1.22 | 0.01354 |
| Q8K194 | SNR27  | U4/U6.U5 small nuclear ribonucleoprotein 27 kDa protein                           | 440.65  | 361.01  | 1.22 | 0.02481 |
| A2AQ19 | RTF1   | RNA polymerase-associated protein RTF1 homolog                                    | 494.90  | 406.13  | 1.22 | 0.01815 |
| Q923Z3 | MTO1   | Protein MTO1 homolog, mitochondrial                                               | 32.54   | 26.77   | 1.22 | 0.00307 |
| Q8BHF7 | PGPS1  | CDP-diacylglycerol--glycerol-3-phosphate 3-phosphatidyltransferase, mitochondrial | 147.91  | 121.89  | 1.21 | 0.01325 |
| Q99J56 | DERL1  | Derlin-1                                                                          | 86.84   | 71.84   | 1.21 | 0.04780 |
| Q3UQA7 | SELH   | Selenoprotein H                                                                   | 475.48  | 393.78  | 1.21 | 0.02780 |
| G3X9N3 | G3X9N3 | PNMA-like 2                                                                       | 258.04  | 214.32  | 1.20 | 0.02339 |
| P22682 | CBL    | E3 ubiquitin-protein ligase CBL                                                   | 20.68   | 17.31   | 1.20 | 0.02113 |

WT, wild type mice; WT:miR155cKO, Cx3cr1<sup>CreERT2</sup>-miR155<sup>fl/fl</sup>-WT mice; FC, fold-change (FC>1.2 included); P<0.05

**Table S8.** Mass spectrometry data showing significantly down-regulated proteins in 4-month-old WT:miR155cKO compared to WT control group.

| Accession  | Symbol     | Description                                                         | WT:miR155cKO (Mean) | WT (Mean) | FC    | p-value |
|------------|------------|---------------------------------------------------------------------|---------------------|-----------|-------|---------|
| A0A0R4J0I1 | A0A0R4J0I1 | Serine protease inhibitor A3K                                       | 714.09              | 1059.25   | -1.48 | 0.02849 |
| Q8CH19     | CS2IP      | Casein kinase II subunit alpha'-interacting protein                 | 318.75              | 470.98    | -1.48 | 0.00029 |
| Q99JW4     | LIMS1      | LIM and senescent cell antigen-like-containing domain protein 1     | 43.31               | 59.02     | -1.36 | 0.02235 |
| F6ZGI7     | F6ZGI7     | Molybdopterin synthase sulfur carrier subunit                       | 57.01               | 75.14     | -1.32 | 0.01053 |
| Q9R0P5     | DEST       | Destrin                                                             | 1723.22             | 2224.28   | -1.29 | 0.02363 |
| Q01768     | NDKB       | Nucleoside diphosphate kinase B                                     | 245.77              | 315.11    | -1.28 | 0.04935 |
| Q5NBX1     | COBL       | Protein cordon-bleu                                                 | 47.68               | 59.89     | -1.26 | 0.03302 |
| Q9R0P9     | UCHL1      | Ubiquitin carboxyl-terminal hydrolase isozyme L1                    | 3903.87             | 4867.96   | -1.25 | 0.01349 |
| Q921G6     | LRCH4      | Leucine-rich repeat and calponin homology domain-containing protein | 16.07               | 20.00     | -1.24 | 0.02973 |

WT, wild type mice; WT:miR155cKO, Cx3cr1<sup>CreERT2</sup>-miR155<sup>fl/fl</sup>-WT mice; FC, fold-change (FC>1.2 included); P<0.05
